# Supplementary material for: Brain rhythms define distinct interaction networks with differential dependence on anatomy
Source: PubMed Central journal article supplement (PMC8639786; doi:10.1016/j.neuron.2021.09.052), 2021-12-01
Supplement: NIHMS1745417-supplement-1.pdf [file NIHMS1745417-supplement-1.pdf]

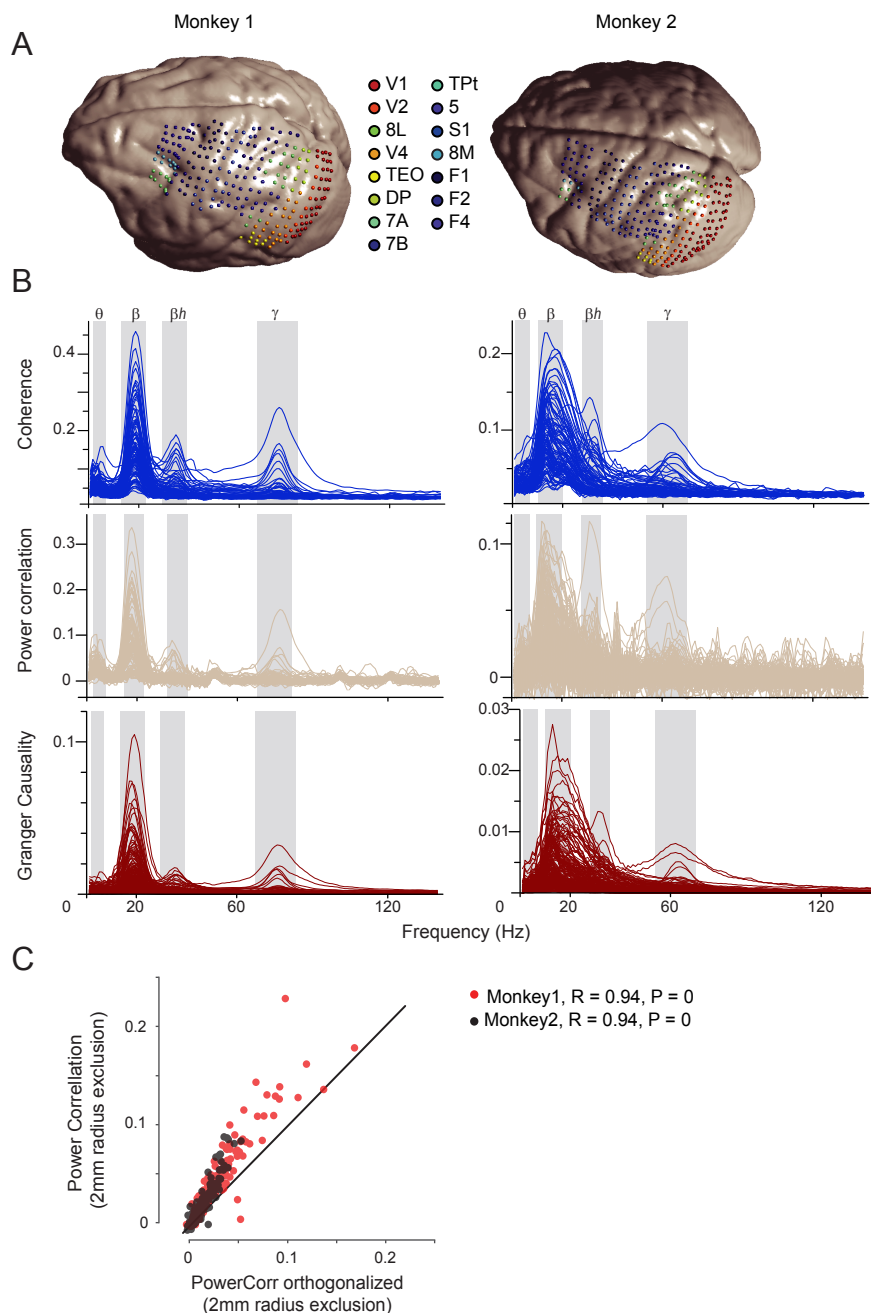

**Figure S1. Recording site distributions and FC spectra per monkey, orthogonalized power correlation. Related to Figure 1.**

(A) ECoG grids registered to brain surface reconstructions from individual MRIs of the two macaque monkeys, as indicated. Sites are colored according to the area color legend on the right, based on the Kennedy lab nomenclature (Markov et al., 2011). V1: Primary visual cortex; V2: Secondary visual cortex; 8L: Lateral part of area 8/FEF; V4: Fourth visual area; TEO: Temporal-occipital area; DP: Dorsal prelunate area; 7A and 7B: Parts A and B of parietal area 7; TPt: temporo-parietal area (posterior auditory association cortex); 5: area 5; S1: Primary somatosensory cortex; 8M: Medial part of area 8/FEF; F1: corresponding to Primary motor cortex; F2: corresponding to the caudal part of dorsal premotor cortex; F4: corresponding to the caudal part ventral premotor cortex.

(B) Same as Fig. 1C, but including power correlation and GC spectra. Spectra from Monkey 1 are in the left column, those of Monkey 2 in the right column. The coherence spectra in this figure are identical to those in Fig. 1C and merely included for completeness.

(C) Scatter plot of power correlation versus orthogonalized power correlation. Each dot corresponds to one pair of recording sites in Monkey 1 (red dots) or Monkey 2 (black dots), excluding sites within a 2 mm radius to avoid residual volume conduction effects. Note that power correlation and orthogonalized power correlation values were highly correlated ( $R=0.94$ ,  $P=0$ ) in both monkeys.

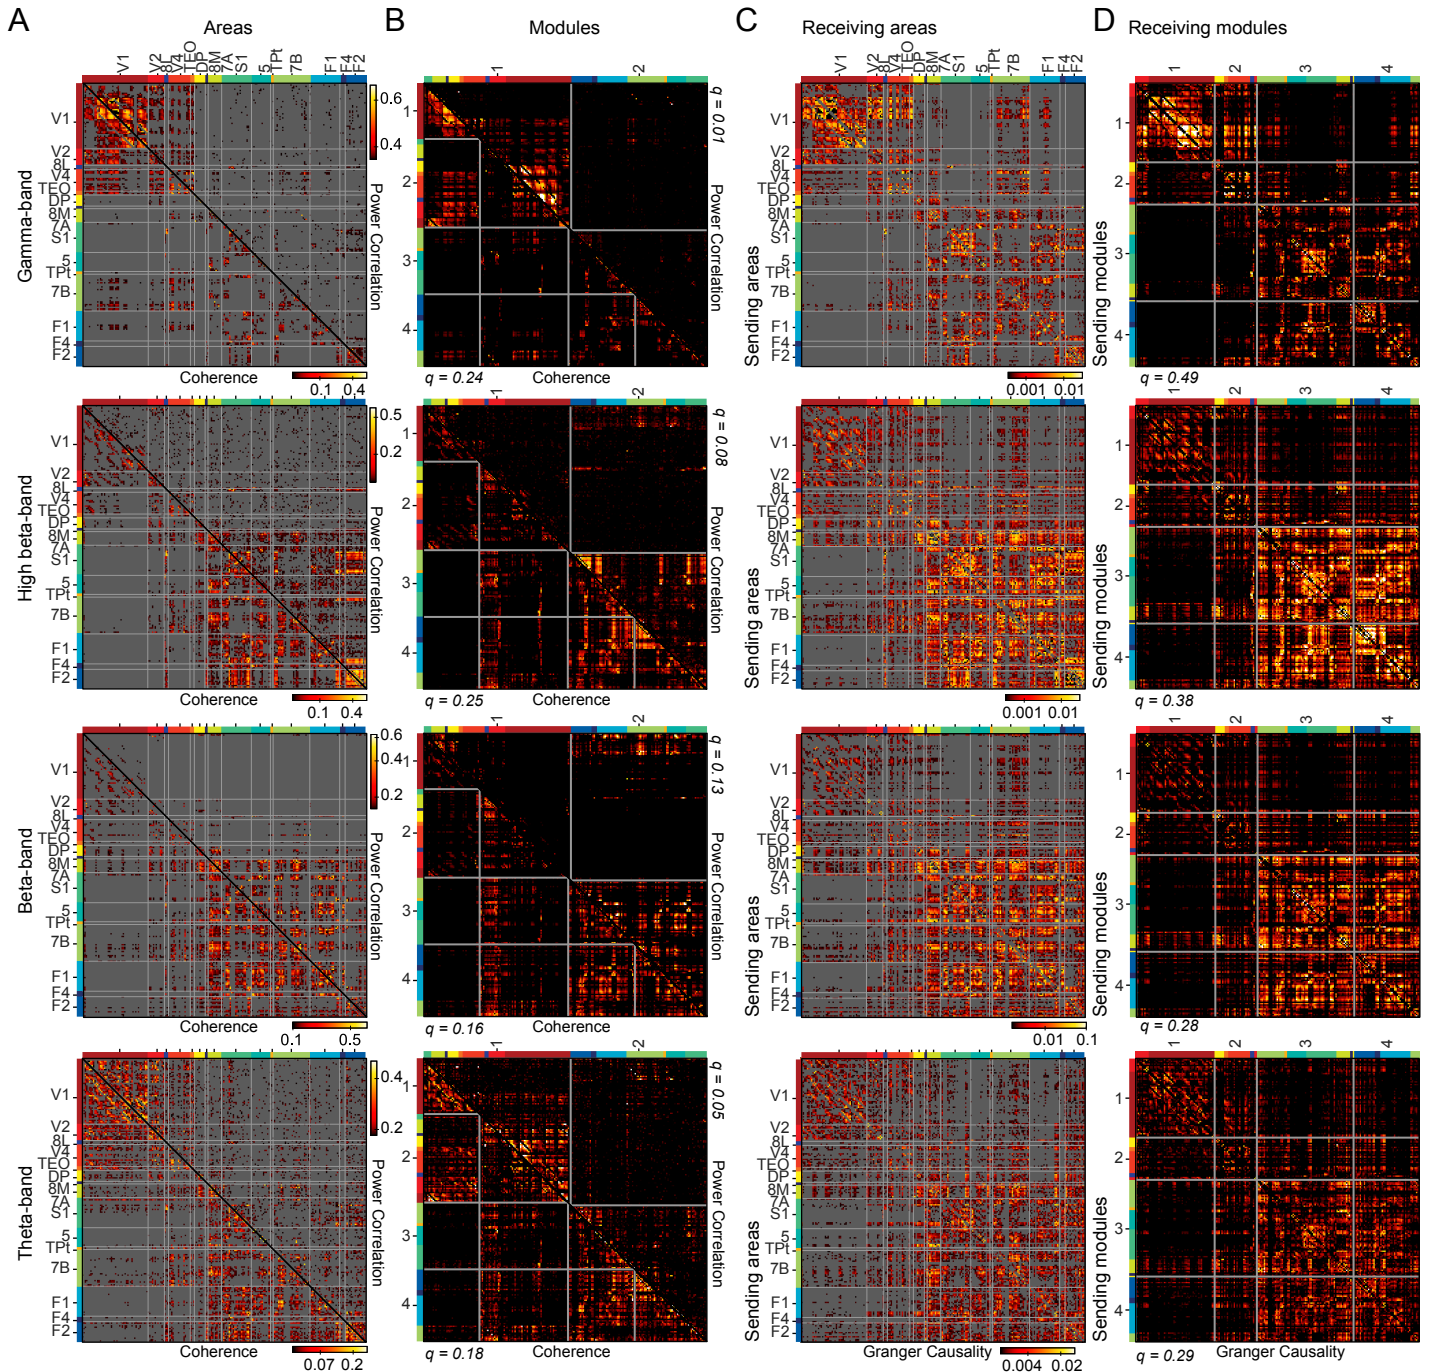

**Figure S2. FC matrices for Monkey 2. Related to Figure 2.**  
(A-D) Same as Fig. 2 A-D, but for Monkey 2.

Fig.S3

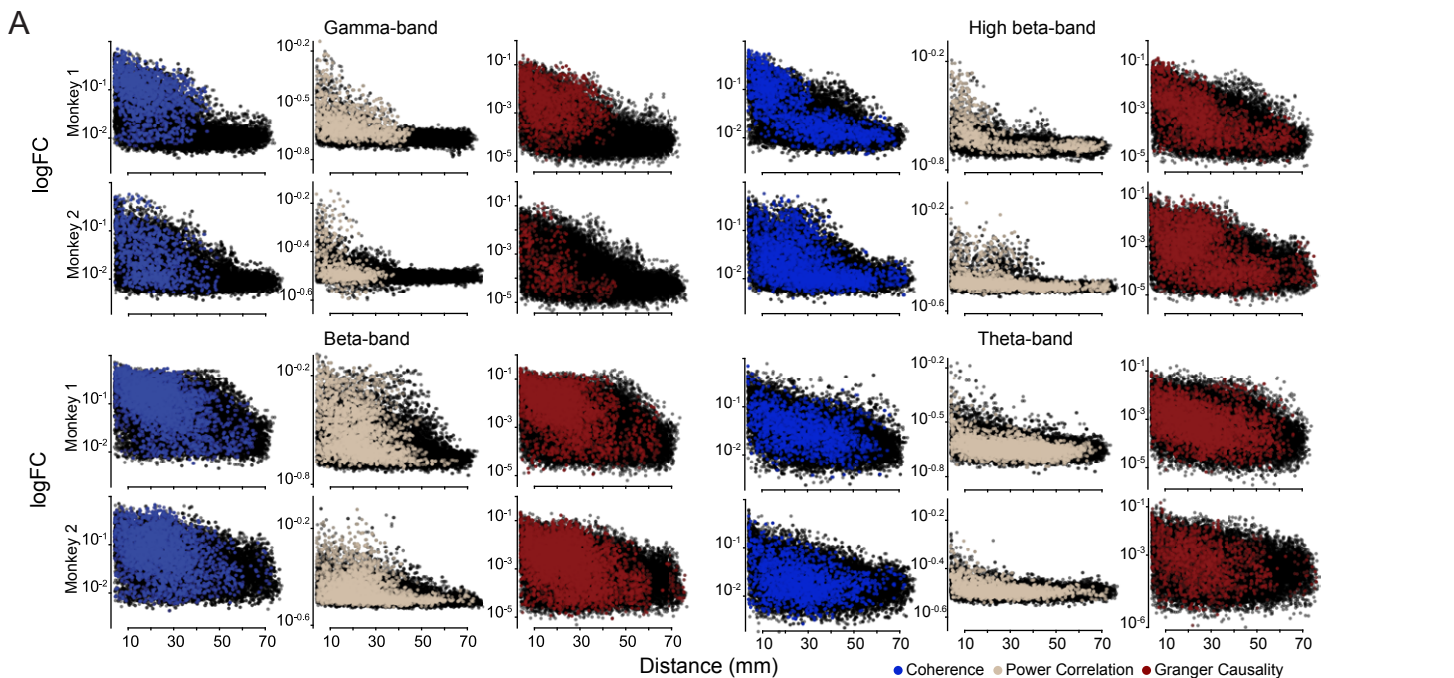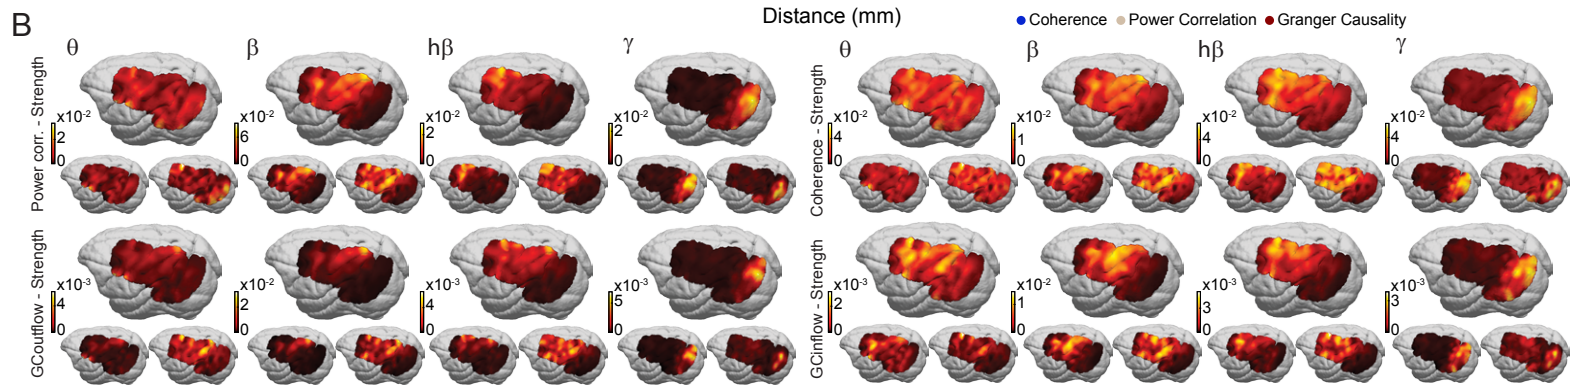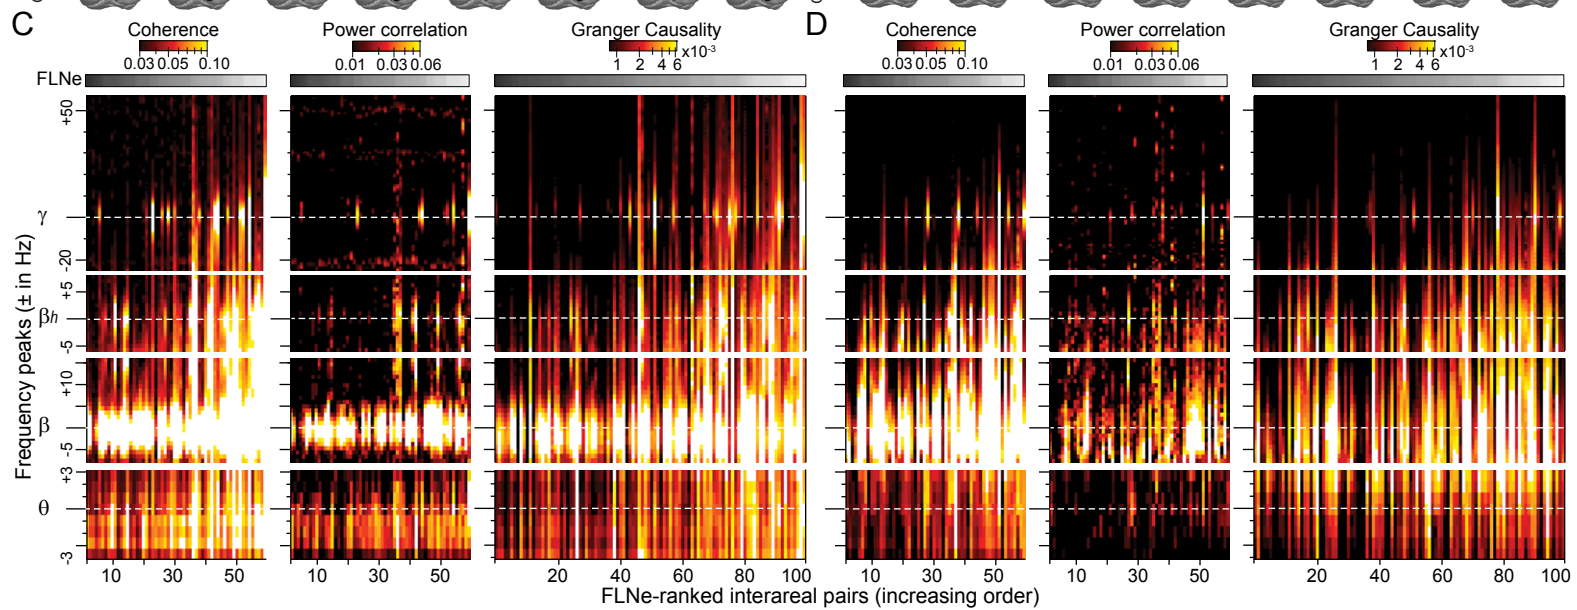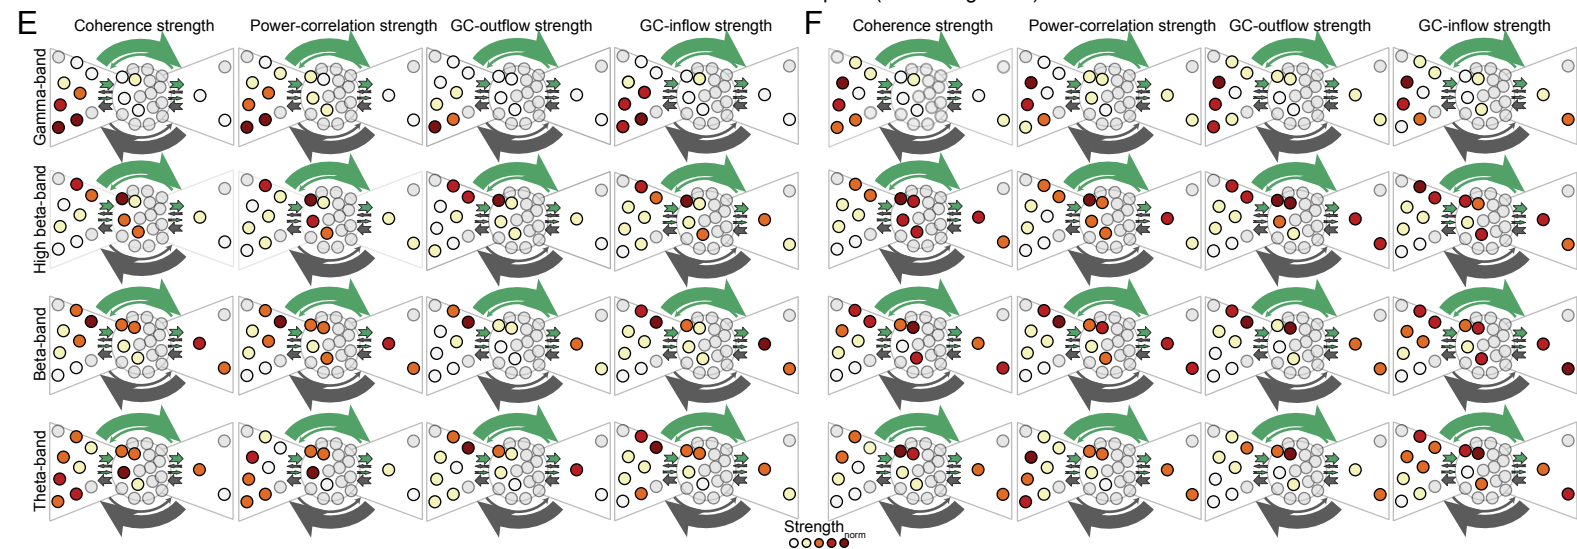

**Figure S3. Per monkey: Site-pair-wise FC versus distance, FC strength topographies, FLNe-ranked FC spectra, and FC strength displayed on the AC-derived core-periphery structure. Related to Figure 3 and Figure 8.**

(A) Scatter plots of FC versus distance on the cortical surface (each dot corresponds to one pair of recording sites from separate cortical areas), separately per FC type (color code on bottom right), per frequency band (as indicated above the four quadrants of the panel), and per monkey (as indicated for odd versus even rows). Black dots indicate lack of significance (comparison to a random graph with equal weight distribution; FDR-corrected for multiple comparisons over sites, see Methods).

(B) Same analyses as in Fig. 3, but showing data for the average over both monkeys (larger brains) and separately per monkey (smaller brains: Monkey 1 on left, Monkey 2 on right). To allow optimal comparison, significance masking was removed. Analyses were performed separately per FC type (as indicated to the left of the four quadrants of the panel), and per frequency band (as indicated on the upper left corner of each column).

(C) Same as left part of Fig. S4A, but for Monkey 1.

(D) Same as left part of Fig. S4A, but for Monkey 2.

(E) Same as Fig. 8, but for Monkey 1.

(F) Same as Fig. 8, but for Monkey 2.

Fig.S4

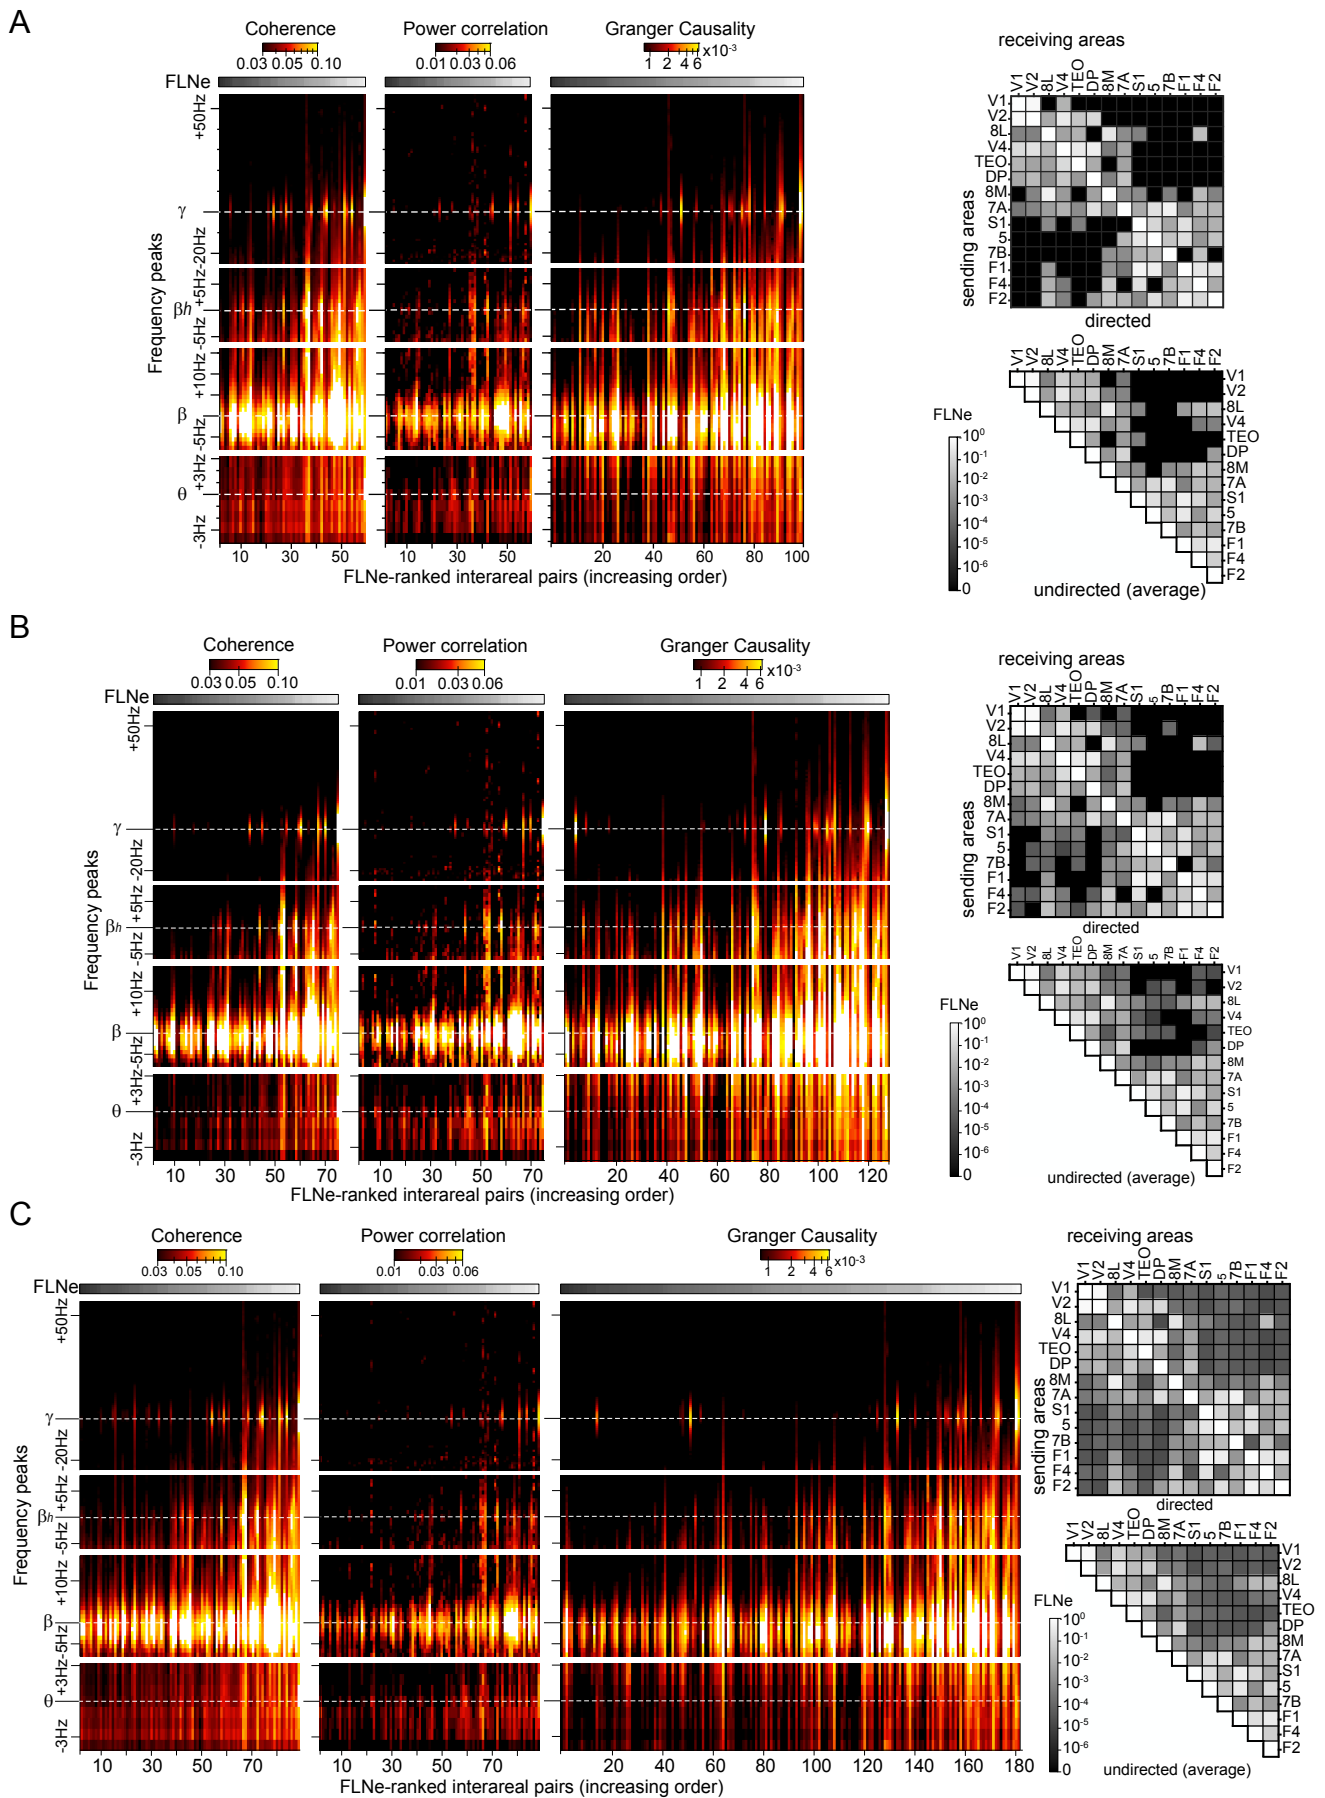

**Figure S4. FLNe and FLNe-sorted FC spectra. Related to Figure 4.**

(A) Coherence, power correlation and GC values (color coded) as a function of frequency (y-axis, relative to per-monkey band-wise peak frequencies) and as a function of FLNe rank (x-axis) of the respective interareal pair. For coherence and power correlation, ranking used FLNe averaged over the two directions as shown in the triangular matrix on the bottom right of the panel. For GC, ranking used FLNe as shown in the full matrix on the top right of the panel. FC values were first averaged over all respective interareal site pairs and subsequently over animals.

(B) Same as (A), but including FLNe values based on less than 10 neurons, while still excluding FLNe values of zero. The corresponding FLNe matrices are shown on the right.

(C) Same as (A), but including FLNe values based on less than 10 neurons, and replacing FLNe values of zero by estimates assuming Poisson distributions fitted to neuron counts from non-zero FLNe distributions. The corresponding FLNe matrices are shown on the right.

Fig.S5

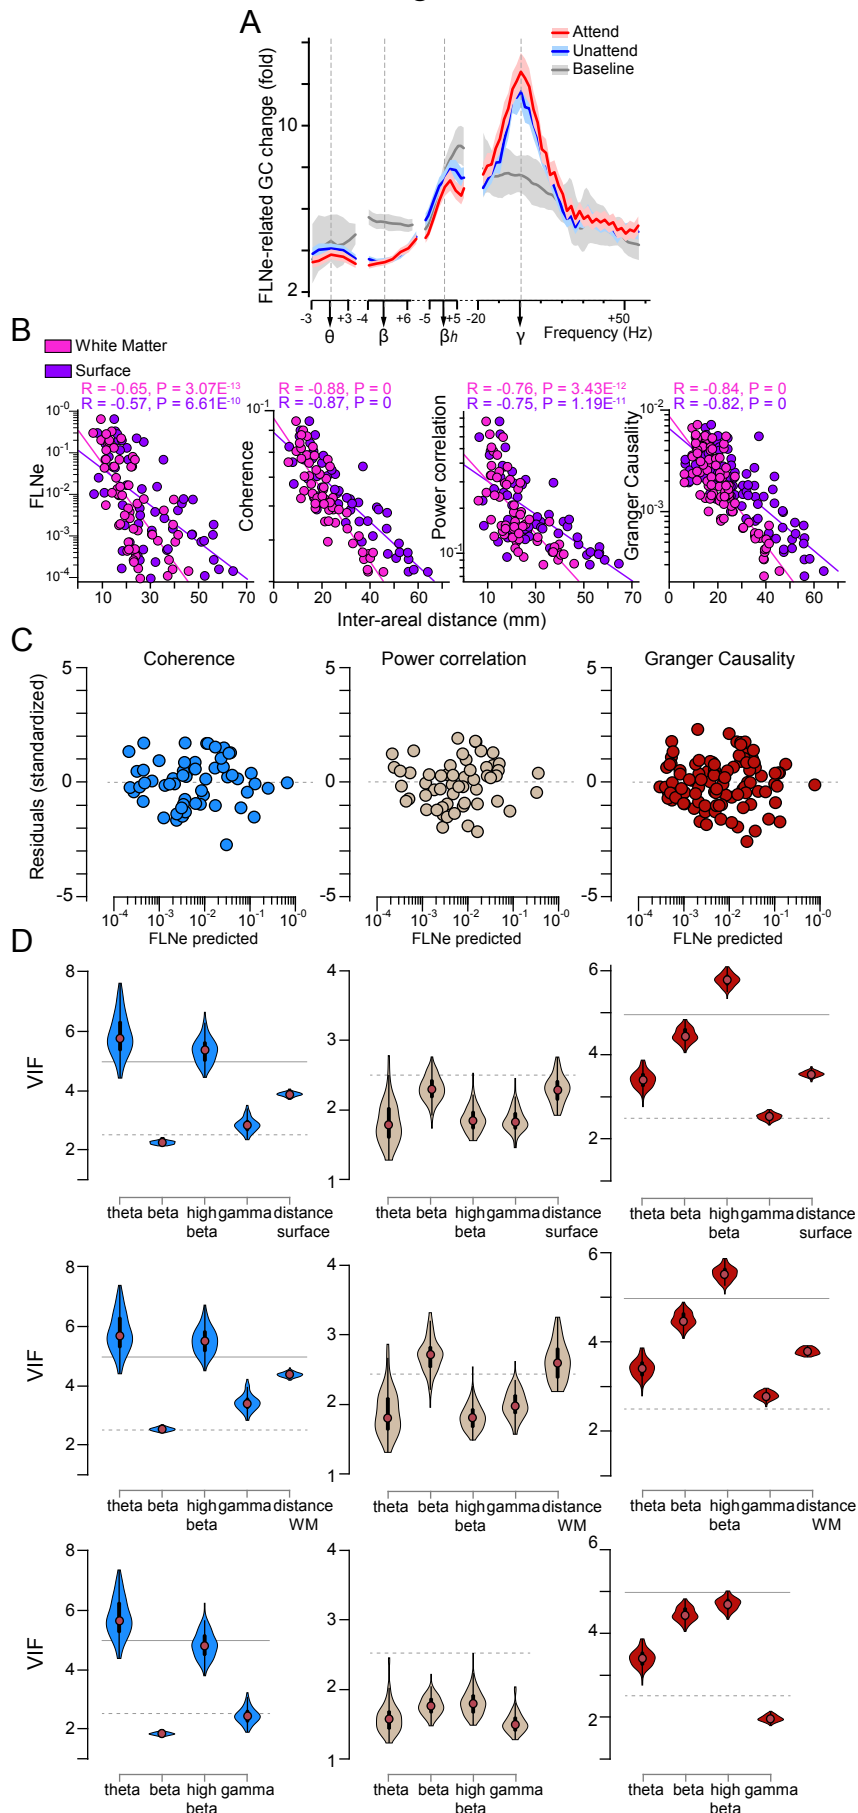

**Figure S5. AC-FC correlation for attention conditions and baseline; AC and FC correlate with interareal distance. Related to Figure 5.**

(A) Same as the FLNe-related GC change shown as red line in Fig. 5C, but here separately for the two attention conditions and the baseline period, as indicated in the color legend on the top right of the panel.

(B) Linear regression of  $\log_{10}(\text{FLNe})$ ,  $\log_{10}(\text{Coherence})$ ,  $\log_{10}(\text{Power correlation})$  and  $\log_{10}(\text{Granger Causality})$  against interareal distance on the brain surface (purple) or through white-matter (pink). For FLNe, each dot corresponds to an interareal projection with more than 10 labeled neurons ( $N=100$ ), for coherence and power correlation, each dot corresponds to a pair of cortical areas ( $N=105$ ), for GC, each dot corresponds to a directed interareal influence ( $N=210$ ). FC values were averaged over the four individual frequency bands and over the two monkeys. Individual decay rates are presented in Table S1.

(C) Scatterplots of residuals against predicted variable verify homoscedasticity for each FC metric.

(D) Variance Inflation Factor (VIF) calculated for each predicting variable of the three models, with interareal distance on the brain surface (top) or through white-matter (WM, middle) as an additional predicting variable or not (bottom).

Dashed ( $VIF = 2.5$ ) and plain lines ( $VIF = 5$ ) show moderate correlation range still below critical level.

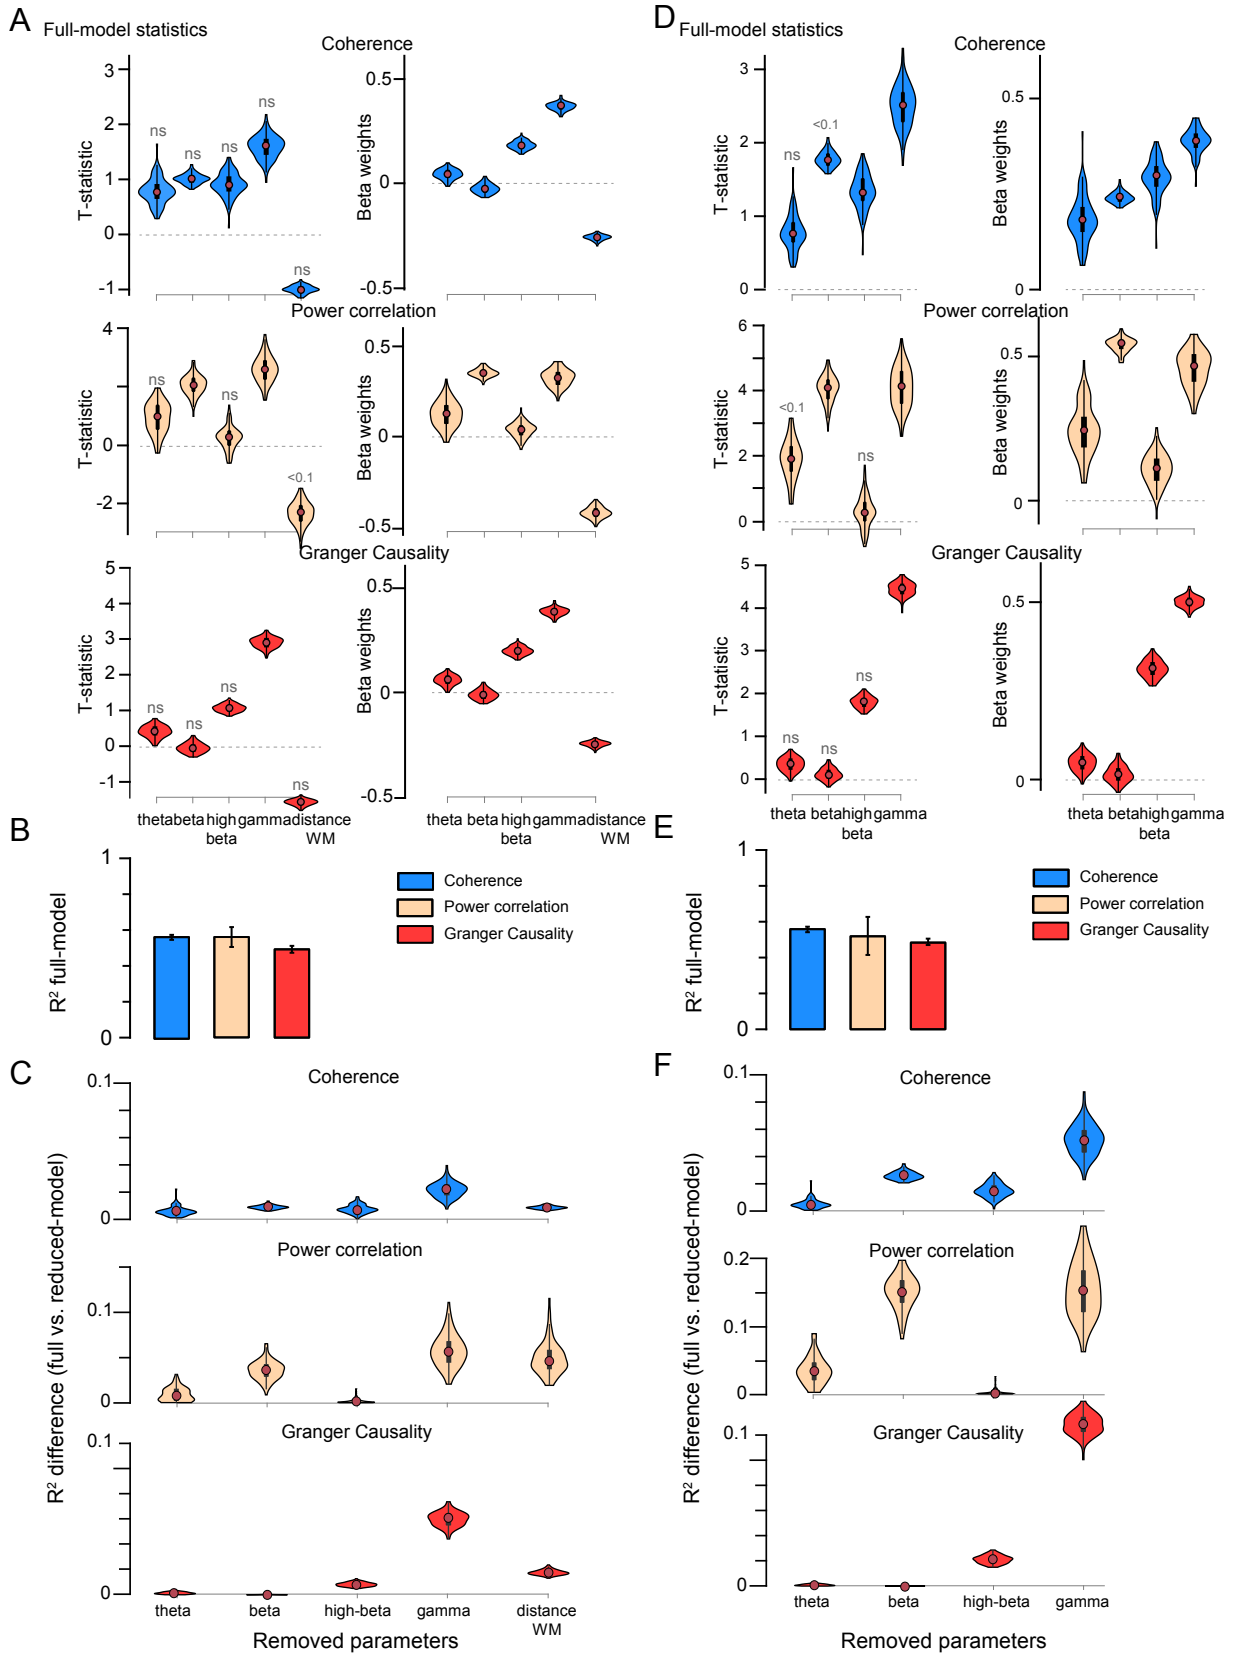

**Figure S6. Multiple linear regression with or without interareal distance as additional predictor. Related to Figure 6.**

(A-C) Same as Figure 6A-C, but using interareal distance through white-matter (WM).

(D-F) Same as Fig.6A-C, but not including interareal distance as predicting variable.

Fig.S7

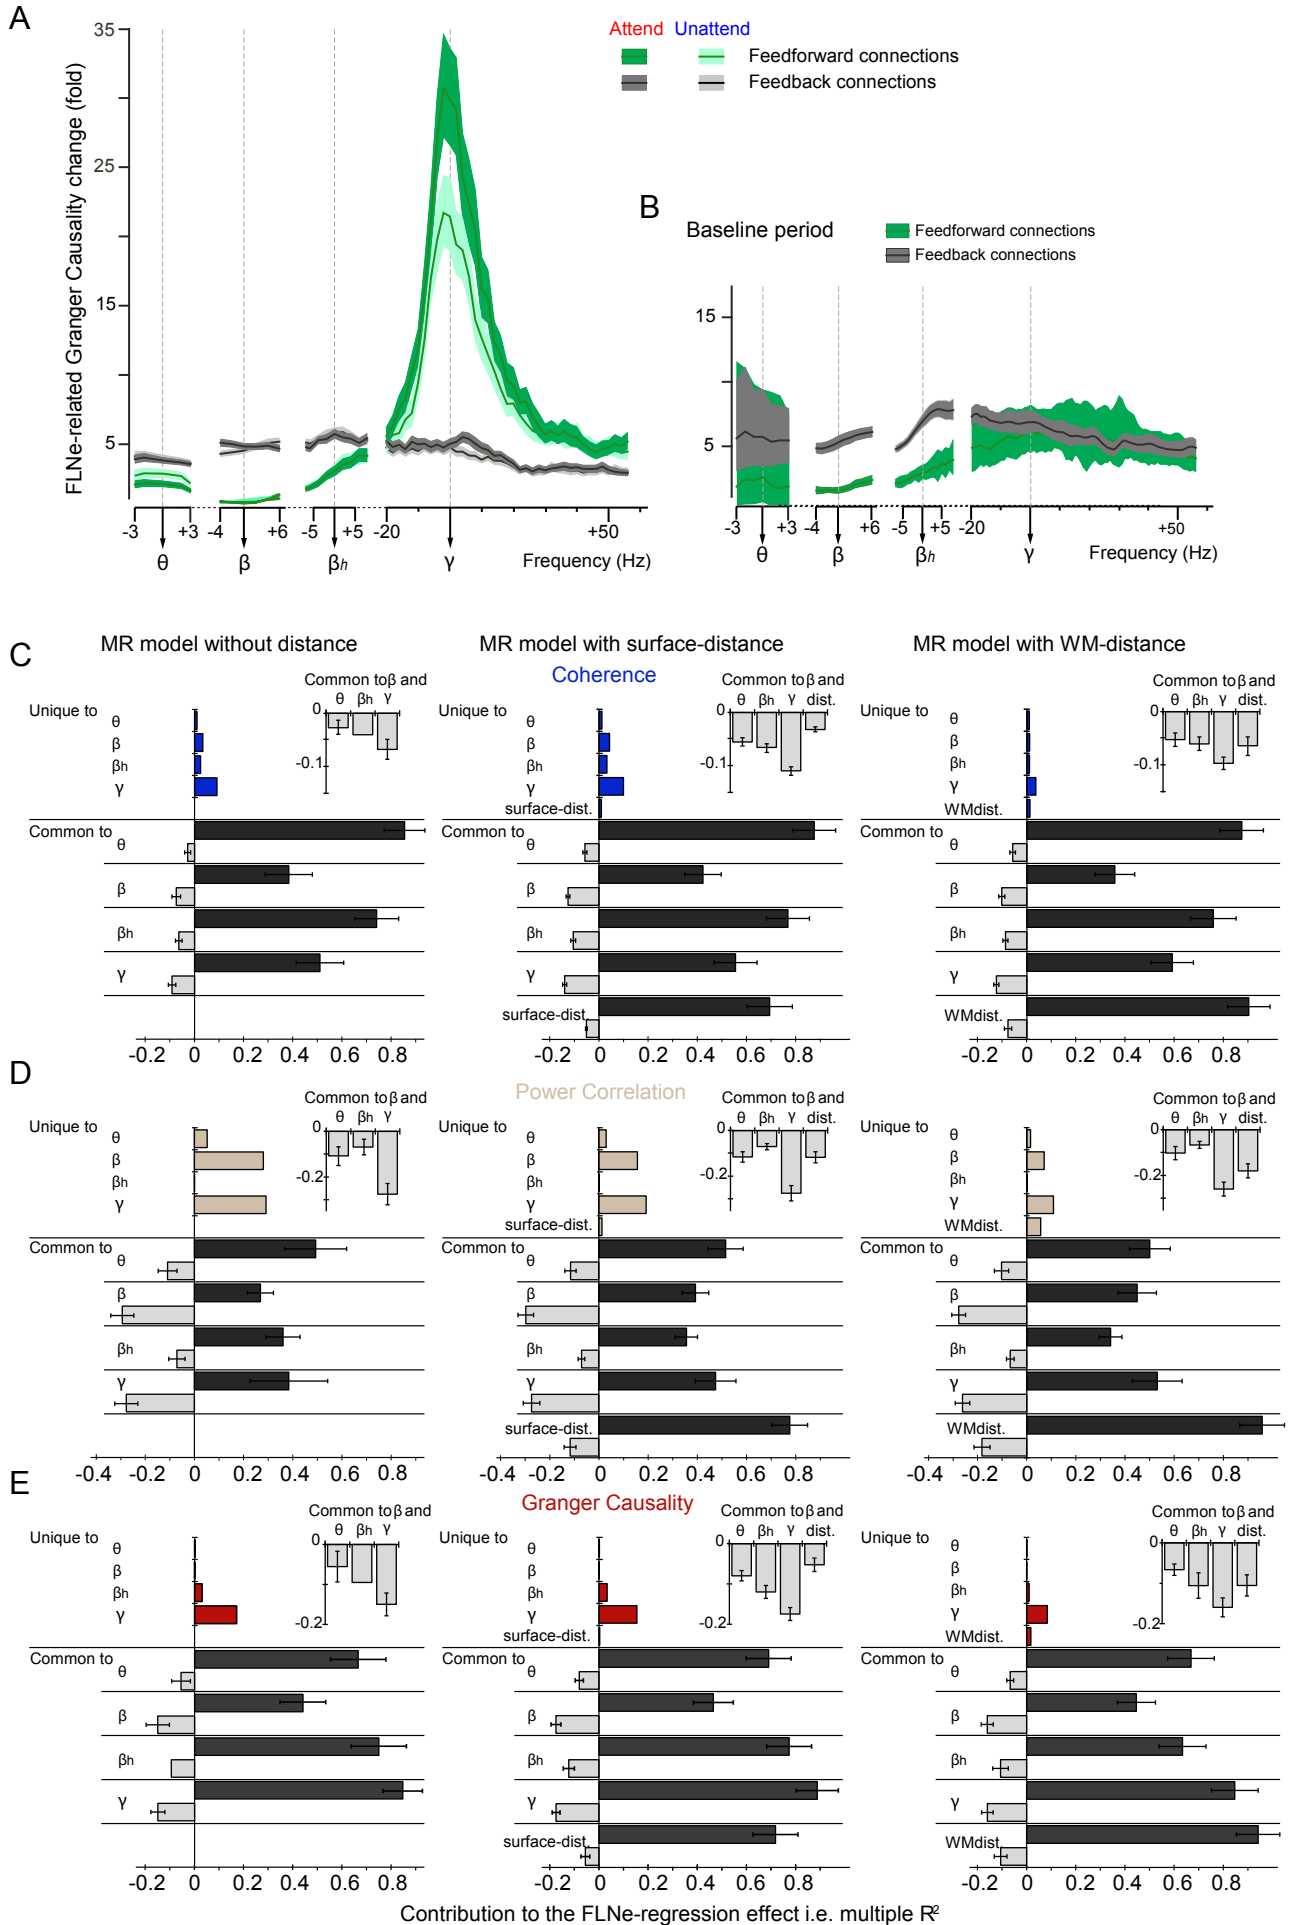



**Figure S7. AC-FC correlation split by SLN and attention conditions; Commonality analysis summary. Related to Figure 7.**

(A) Same as Fig. 7A (main panel), but separately for the two attention conditions indicated at the top.

(B) Same as Fig. 7A (main panel), but for the Baseline period.

(C-E) Unique (*Direct*) and Common (*Shared*) effects for all predictor variables as proportion of the regression effect (i.e. multiple  $R^2$ ) for MR models with and without distance as additional regressor and for the three FC metrics: Coherence (C), Power Correlations (D), Granger Causality (E). Common (*Shared*) effects are summed separately for positive and negative effects. Inset displays summed Common negative effects for all pairs of predictors involving beta-band synchronizations, Sum  $\pm$  SD.

Results demonstrate that FC in the gamma band is the dominant variable, with the strongest direct effect and the highest relative importance in MR models predicting FLNe, with or without partial regression of distance. Commonality analysis identified a substantial proportion of the regression effect caused by suppression in MR models, consistently involving FC in the beta-frequency band (sum of negative shared coefficients for Coherence, Power Correlation and GC: 9.73%-29.4%-15.03% without distance, 17.64%-29.75%-17.79% with surface-distance and 12.97%-27.74%-15.98% with WM-distance). The amount of overall suppression caused by beta-band FC in the model was strongest when combined with FC in the gamma-frequency band (insets Fig.S7C-E) suggesting subtle involvement of cross-frequency interactions in the observed regression effect. Furthermore, in all models, we observed that beta-band FC contributed the least to the MR effect (i.e. lowest  $rs^2$ ). Hence, even if poorly predictive of FLNe, the main contribution of beta-band FC to the MR effect was to increase FLNe-predictive power of the remaining variables and mostly for gamma-band FC.

Fig.S8

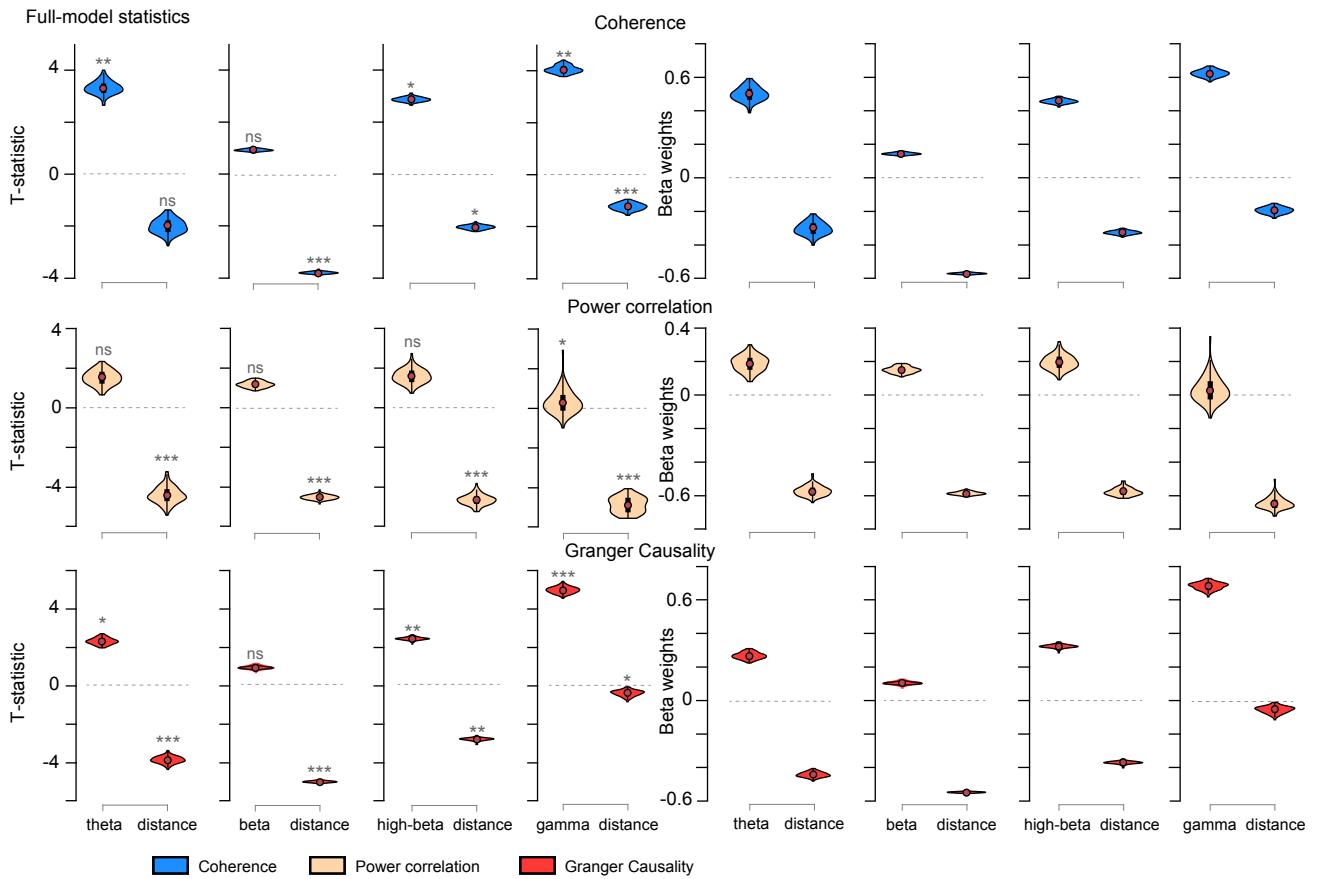

**Figure S8. Multiple regression per frequency band. Related to Figure 6.**

Similar analysis as Fig. 6, showing T-statistics and Beta weights of multiple linear regressions, with the dependent variable being  $\log_{10}(\text{FLNe})$ , and the independent variables being distance (on the cortical surface) and  $\log_{10}(\text{FC})$ , but now separately for theta, beta, high-beta and gamma, as indicated on the x-axes. The different FC types are shown in the four rows.

**TableS1. Exponential decay rates of FC measures with interareal distance. Related to Figure S5.**

Mean over all trials  $\pm$  SEM estimated from bootstrap over trials.

|           | Interareal distance | Coherence                          | Power Correlations                | Granger Causality                  |
|-----------|---------------------|------------------------------------|-----------------------------------|------------------------------------|
| Theta     | WM                  | $0.024 \pm 0.0005 \text{ mm}^{-1}$ | $0.028 \pm 0.004 \text{ mm}^{-1}$ | $0.055 \pm 0.0012 \text{ mm}^{-1}$ |
|           | surface             | $0.016 \pm 0.004 \text{ mm}^{-1}$  | $0.018 \pm 0.003 \text{ mm}^{-1}$ | $0.034 \pm 0.0008 \text{ mm}^{-1}$ |
| Beta      | WM                  | $0.033 \pm 0.0003 \text{ mm}^{-1}$ | $0.032 \pm 0.001 \text{ mm}^{-1}$ | $0.063 \pm 0.0007 \text{ mm}^{-1}$ |
|           | surface             | $0.021 \pm 0.0002 \text{ mm}^{-1}$ | $0.019 \pm 0.001 \text{ mm}^{-1}$ | $0.039 \pm 0.0005 \text{ mm}^{-1}$ |
| High-Beta | WM                  | $0.042 \pm 0.0004 \text{ mm}^{-1}$ | $0.028 \pm 0.003 \text{ mm}^{-1}$ | $0.085 \pm 0.0008 \text{ mm}^{-1}$ |
|           | surface             | $0.027 \pm 0.0003 \text{ mm}^{-1}$ | $0.018 \pm 0.002 \text{ mm}^{-1}$ | $0.055 \pm 0.0005 \text{ mm}^{-1}$ |
| Gamma     | WM                  | $0.027 \pm 0.0004 \text{ mm}^{-1}$ | $0.015 \pm 0.002 \text{ mm}^{-1}$ | $0.075 \pm 0.0008 \text{ mm}^{-1}$ |
|           | surface             | $0.018 \pm 0.0003 \text{ mm}^{-1}$ | $0.010 \pm 0.001 \text{ mm}^{-1}$ | $0.049 \pm 0.0006 \text{ mm}^{-1}$ |

**TableS2. Summary statistics of multiple regression models for FLNe. Related to Figure 6 and Figure S6.**

Relative importance measures (Commonality Analysis: Direct and Shared coefficients, General Dominance – GenDom., adjusted Effect Size and Relative Importance Weights – RIW) performed on the mean over all trials; otherwise, mean  $\pm$  99.9% CI estimated from bootstrap over trials.

Coherence

| Predictors    | R <sup>2</sup>      | R <sub>adj</sub> <sup>2</sup> | NRMSE               | r <sub>s</sub> <sup>2</sup> | Beta values         | Beta weights        | sig.   | Direct | Shared | GenDom. | Effect size | RIW   |
|---------------|---------------------|-------------------------------|---------------------|-----------------------------|---------------------|---------------------|--------|--------|--------|---------|-------------|-------|
|               | 0.563<br>$\pm$ 0.02 | 0.522<br>$\pm$ 0.02           | 0.23<br>$\pm$ 0.002 |                             |                     |                     |        |        |        |         |             |       |
| Theta         |                     |                               |                     | 0.83 $\pm$<br>0.08          | 1.73 $\pm$<br>1.65  | 0.20 $\pm$<br>0.19  | ns     | 0.0068 | 0.4606 | 0.153   | 0.136       | 0.138 |
| Beta          |                     |                               |                     | 0.34 $\pm$<br>0.02          | 1.33 $\pm$<br>0.26  | 0.28 $\pm$<br>0.05  | < 0.1  | 0.0241 | 0.1914 | 0.066   | 0.105       | 0.079 |
| High-beta     |                     |                               |                     | 0.69 $\pm$<br>0.03          | 1.66 $\pm$<br>0.75  | 0.34 $\pm$<br>0.15  | ns     | 0.0183 | 0.3919 | 0.125   | 0.203       | 0.123 |
| Gamma         |                     |                               |                     | 0.51 $\pm$<br>0.04          | 2.23 $\pm$<br>0.53  | 0.43 $\pm$<br>0.10  | 0.0165 | 0.0562 | 0.2851 | 0.123   | 0.213       | 0.144 |
| Surface dist. |                     |                               |                     | 0.65 $\pm$<br>0.02          | 0.01 $\pm$<br>.003  | 0.17 $\pm$<br>0.04  | ns     | 0.0056 | 0.3678 | 0.096   | -0.093      | 0.080 |
|               | 0.569<br>$\pm$ 0.01 | 0.528<br>$\pm$ 0.01           | 0.23<br>$\pm$ 0.002 |                             |                     |                     |        |        |        |         |             |       |
| Theta         |                     |                               |                     | 0.83 $\pm$<br>0.08          | 1.58 $\pm$<br>1.59  | 0.19 $\pm$<br>0.19  | ns     | 0.0057 | 0.4618 | 0.144   | 0.123       | 0.133 |
| Beta          |                     |                               |                     | 0.34 $\pm$<br>0.02          | 0.76 $\pm$<br>0.22  | 0.16 $\pm$<br>0.04  | ns     | 0.0064 | 0.1850 | 0.057   | 0.057       | 0.068 |
| High-beta     |                     |                               |                     | 0.69 $\pm$<br>0.03          | 1.04 $\pm$<br>0.76  | 0.21 $\pm$<br>0.15  | ns     | 0.0061 | 0.3858 | 0.115   | 0.119       | 0.114 |
| Gamma         |                     |                               |                     | 0.50 $\pm$<br>0.04          | 1.52 $\pm$<br>0.57  | 0.29 $\pm$<br>0.11  | ns     | 0.0206 | 0.2645 | 0.104   | 0.141       | 0.123 |
| WM dist.      |                     |                               |                     | 0.84 $\pm$<br>0.02          | -0.02 $\pm$<br>.005 | -0.21 $\pm$<br>0.04 | ns     | 0.0072 | 0.4674 | 0.146   | 0.126       | 0.128 |
|               | 0.558<br>$\pm$ 0.01 | 0.525<br>$\pm$ 0.02           | 0.23<br>$\pm$ 0.002 |                             |                     |                     |        |        |        |         |             |       |
| Theta         |                     |                               |                     | 0.84 $\pm$<br>0.08          | 1.56 $\pm$<br>1.60  | 0.18 $\pm$<br>0.19  | ns     | 0.0055 | 0.4619 | 0.184   | 0.121       | 0.162 |
| Beta          |                     |                               |                     | 0.34 $\pm$<br>0.02          | -1.14 $\pm$<br>0.22 | 0.24 $\pm$<br>0.04  | < 0.1  | 0.0188 | 0.1726 | 0.080   | 0.086       | 0.091 |
| High-beta     |                     |                               |                     | 0.70 $\pm$<br>0.03          | 1.44 $\pm$<br>0.75  | 0.29 $\pm$<br>0.15  | ns     | 0.0137 | 0.3782 | 0.152   | 0.166       | 0.146 |
| Gamma         |                     |                               |                     | 0.51 $\pm$<br>0.04          | 2.02 $\pm$<br>0.53  | 0.39 $\pm$<br>0.10  | 0.02   | 0.0511 | 0.2340 | 0.142   | 0.186       | 0.160 |

**Table S2 (continued). Summary statistics of multiple regression models for FLNe.**  
Mean over all trials  $\pm$  99.9% CI estimated from bootstrap over trials.

Power correlations

| Predictors    | R <sup>2</sup>      | R <sub>adj</sub> <sup>2</sup> | NRMSE               | r <sub>s</sub> <sup>2</sup> | Beta values         | Beta weights        | sig.   | Direct | Shared  | GenDom. | Effect size | RIW   |
|---------------|---------------------|-------------------------------|---------------------|-----------------------------|---------------------|---------------------|--------|--------|---------|---------|-------------|-------|
|               | 0.545<br>$\pm$ 0.08 | 0.502<br>$\pm$ 0.08           | 0.23<br>$\pm$ 0.01  |                             |                     |                     |        |        |         |         |             |       |
| Theta         |                     |                               |                     | 0.43<br>$\pm$ 0.28          | 0.83<br>$\pm$ 1.21  | 0.19<br>$\pm$ 0.24  | ns     | 0.0164 | 0.2193  | 0.092   | 0.086       | 0.094 |
| Beta          |                     |                               |                     | 0.25<br>$\pm$ 0.07          | 2.03<br>$\pm$ 0.75  | 0.49<br>$\pm$ 0.18  | 0.0028 | 0.0859 | 0.0525  | 0.107   | 0.167       | 0.118 |
| High-beta     |                     |                               |                     | 0.29<br>$\pm$ 0.18          | 0.05<br>$\pm$ 0.86  | 0.01<br>$\pm$ 0.20  | ns     | 0.0001 | 0.1565  | 0.051   | 0.004       | 0.049 |
| Gamma         |                     |                               |                     | 0.39<br>$\pm$ 0.14          | 2.44<br>$\pm$ 1.06  | 0.49<br>$\pm$ 0.21  | 0.0011 | 0.1051 | 0.1103  | 0.149   | 0.210       | 0.159 |
| Surface dist. |                     |                               |                     | 0.67<br>$\pm$ 0.10          | -0.01<br>$\pm$ 0.01 | -0.14<br>$\pm$ 0.18 | ns     | 0.0070 | 0.3608  | 0.146   | 0.079       | 0.125 |
|               | 0.571<br>$\pm$ 0.05 | 0.529<br>$\pm$ 0.06           | 0.23<br>$\pm$ 0.007 |                             |                     |                     |        |        |         |         |             |       |
| Theta         |                     |                               |                     | 0.41 $\pm$<br>0.26          | 0.61 $\pm$<br>1.15  | 0.14<br>$\pm$ 0.23  | ns     | 0.0087 | 0.2770  | 0.086   | 0.063       | 0.089 |
| Beta          |                     |                               |                     | 0.24 $\pm$<br>0.06          | -1.50 $\pm$<br>0.77 | 0.36<br>$\pm$ 0.18  | 0.0316 | 0.043  | 0.0981  | 0.089   | 0.124       | 0.100 |
| High-beta     |                     |                               |                     | 0.27 $\pm$<br>0.17          | 0.11 $\pm$<br>0.73  | 0.03<br>$\pm$ 0.17  | ns     | 0.0004 | 0.1562  | 0.050   | 0.010       | 0.049 |
| Gamma         |                     |                               |                     | 0.38 $\pm$<br>0.14          | 1.97<br>$\pm$ 1.00  | 0.40<br>$\pm$ 0.20  | 0.0085 | 0.0618 | 0.1536  | 0.129   | 0.170       | 0.139 |
| WM dist.      |                     |                               |                     | 0.83 $\pm$<br>0.08          | -0.03 $\pm$<br>0.02 | -0.32<br>$\pm$ 0.17 | < 0.1  | 0.0321 | 0.4425  | 0.216   | 0.204       | 0.194 |
|               | 0.539<br>$\pm$ 0.10 | 0.504<br>$\pm$ 0.11           | 0.23<br>$\pm$ 0.01  |                             |                     |                     |        |        |         |         |             |       |
| Theta         |                     |                               |                     | 0.39 $\pm$<br>0.26          | 1.25 $\pm$<br>1.32  | 0.24<br>$\pm$ 0.26  | < 0.1  | 0.0281 | 0.2076  | 0.125   | 0.105       | 0.122 |
| Beta          |                     |                               |                     | 0.27 $\pm$<br>0.08          | 2.34 $\pm$<br>0.71  | 0.56<br>$\pm$ 0.16  | 0.0001 | 0.1516 | -0.0132 | 0.151   | 0.191       | 0.155 |
| High-beta     |                     |                               |                     | 0.31 $\pm$<br>0.19          | 0.15 $\pm$<br>0.94  | 0.03<br>$\pm$ 0.22  | ns     | 0.0003 | 0.1563  | 0.000   | 0.010       | 0.062 |
| Gamma         |                     |                               |                     | 0.36 $\pm$<br>0.14          | 2.70 $\pm$<br>1.11  | 0.55<br>$\pm$ 0.21  | 0.0001 | 0.1574 | 0.0580  | 0.157   | 0.233       | 0.199 |

**Table S2 (continued). Summary statistics of multiple regression models for FLNe.**

Mean over all trials  $\pm$  99.9% CI estimated from bootstrap over trials.

Granger Causality

| Predictors    | R <sup>2</sup>      | R <sub>adj</sub> <sup>2</sup> | NRMSE               | r <sub>s</sub> <sup>2</sup> | Beta values       | Beta weights     | sig.   | Direct | Shared | GenDom. | Effect size | RIW   |
|---------------|---------------------|-------------------------------|---------------------|-----------------------------|-------------------|------------------|--------|--------|--------|---------|-------------|-------|
|               | 0.485<br>$\pm$ 0.02 | 0.458<br>$\pm$ 0.02           | 0.23<br>$\pm$ 0.02  |                             |                   |                  |        |        |        |         |             |       |
| Theta         |                     |                               |                     | 0.61 $\pm$ 0.07             | 0.24 $\pm$ 0.27   | 0.07 $\pm$ 0.07  | ns     | 0.0009 | 0.2963 | 0.079   | 0.037       | 0.073 |
| Beta          |                     |                               |                     | 0.29 $\pm$ 0.03             | -0.09 $\pm$ 0.17  | -0.04 $\pm$ 0.07 | ns     | 0.0002 | 0.1412 | 0.039   | -0.014      | 0.039 |
| High-beta     |                     |                               |                     | 0.68 $\pm$ 0.03             | 0.78 $\pm$ 0.20   | 0.36 $\pm$ 0.08  | < 0.1  | 0.0162 | 0.3162 | 0.100   | 0.191       | 0.090 |
| Gamma         |                     |                               |                     | 0.87 $\pm$ 0.03             | 1.17 $\pm$ 0.17   | 0.53 $\pm$ 0.06  | 0.0004 | 0.0751 | 0.3465 | 0.183   | 0.316       | 0.199 |
| Surface dist. |                     |                               |                     | 0.67 $\pm$ 0.02             | -0.01 $\pm$ 0.003 | 0.09 $\pm$ 0.05  | ns     | 0.0016 | 0.3220 | 0.085   | -0.045      | 0.084 |
|               | 0.492<br>$\pm$ 0.01 | 0.465<br>$\pm$ 0.01           | 0.23<br>$\pm$ 0.001 |                             |                   |                  |        |        |        |         |             |       |
| Theta         |                     |                               |                     | 0.60 $\pm$ 0.07             | 0.19 $\pm$ 0.29   | 0.06 $\pm$ 0.08  | ns     | 0.0005 | 0.2967 | 0.074   | 0.030       | 0.069 |
| Beta          |                     |                               |                     | 0.29 $\pm$ 0.02             | -0.08 $\pm$ 0.17  | -0.03 $\pm$ 0.07 | ns     | 0.0002 | 0.1414 | 0.037   | -0.012      | 0.036 |
| High-beta     |                     |                               |                     | 0.67 $\pm$ 0.03             | 0.44 $\pm$ 0.16   | 0.20 $\pm$ 0.06  | ns     | 0.0052 | 0.3324 | 0.092   | 0.108       | 0.083 |
| Gamma         |                     |                               |                     | 0.86 $\pm$ 0.03             | 0.89 $\pm$ 0.17   | 0.40 $\pm$ 0.06  | 0.007  | 0.0414 | 0.4216 | 0.160   | 0.240       | 0.178 |
| WM dist.      |                     |                               |                     | 0.85 $\pm$ 0.02             | -0.02 $\pm$ 0.004 | -0.21 $\pm$ 0.04 | ns     | 0.0086 | 0.4202 | 0.130   | 0.127       | 0.126 |
|               | 0.484<br>$\pm$ 0.02 | 0.462<br>$\pm$ 0.02           | 0.23<br>$\pm$ 0.002 |                             |                   |                  |        |        |        |         |             |       |
| Theta         |                     |                               |                     | 0.61 $\pm$ 0.07             | 0.24 $\pm$ 0.27   | 0.07 $\pm$ 0.07  | ns     | 0.0009 | 0.2963 | 0.097   | 0.038       | 0.087 |
| Beta          |                     |                               |                     | 0.29 $\pm$ 0.03             | -0.09 $\pm$ 0.17  | -0.04 $\pm$ 0.07 | ns     | 0.0002 | 0.1412 | 0.048   | -0.014      | 0.045 |
| High-beta     |                     |                               |                     | 0.69 $\pm$ 0.03             | 0.68 $\pm$ 0.19   | 0.31 $\pm$ 0.07  | ns     | 0.0148 | 0.3176 | 0.125   | 0.165       | 0.111 |
| Gamma         |                     |                               |                     | 0.87 $\pm$ 0.03             | 1.09 $\pm$ 0.15   | 0.49 $\pm$ 0.05  | 0.0002 | 0.0831 | 0.3385 | 0.214   | 0.295       | 0.240 |
